# Supplementary material for: Ambipolar charge-trapping in self-assembled nanostructures of a supramolecular miktoarm star-shaped copolymer with a zinc phthalocyanine core
Source: Royal Society of Chemistry journal article supplement (doi:10.1039/d4tc01265h), 2024-01-01
Supplement: d4tc01265h1.pdf [file d4tc01265h1.pdf]

## Supporting information

### **Ambipolar charge-trapping in self-assembled nanostructures of supramolecular miktoarm star-shaped copolymer with a zinc phthalocyanine core**

Xinhao Zhong,<sup>a,b</sup> Debdatta Panigrahi,<sup>c</sup> Ryoma Hayakawa,<sup>c</sup> Yutaka Wakayama,<sup>\*c</sup> Koji Harano,<sup>d</sup> Masayuki Takeuchi,<sup>\*a,b</sup> and Junko Aimi<sup>\*a</sup>

<sup>a</sup> Research Center for Macromolecules and Biomaterials, National Institute for Materials Science (NIMS), 1-2-1 Sengen, Tsukuba, Ibaraki 305-0047, Japan

<sup>b</sup> Department of Materials Science and Engineering, Faculty of Pure & Applied Sciences, University of Tsukuba, 1-1-1 Tennodai, Tsukuba, Ibaraki 305-8577, Japan

<sup>c</sup> Research Center for Materials Nanoarchitectonics (MANA), NIMS, 1-1 Namiki, Tsukuba, Ibaraki 305-0044, Japan

<sup>d</sup> Center for Basic Research on Materials, NIMS, 1-1 Namiki, Tsukuba, Ibaraki 305-0044, Japan

**Table S1.** List of polymers

| Polymer             | Molecular structure | $M_n$<br>(Kg mol <sup>-1</sup> ) <sup>a</sup> | $M_w/M_n$ <sup>a</sup> | DP              |
|---------------------|---------------------|-----------------------------------------------|------------------------|-----------------|
| ZnPcPS <sub>4</sub> |                     | 14.2                                          | 1.09                   | 36 <sup>b</sup> |
| PS <sub>4</sub>     |                     | 16.1                                          | 1.10                   | 39 <sup>b</sup> |
| pyPMMA              |                     | 13.9                                          | 1.12                   | 132             |
| pyPVAc              |                     | 16.1                                          | 1.27                   | 207             |
| pyPVK               |                     | 13.0                                          | 1.22                   | 74              |

<sup>a</sup>) Number-average molecular weight and polydispersity determined by GPC analysis. <sup>b</sup>) Degree of polymerization (DP) estimated for each arm.

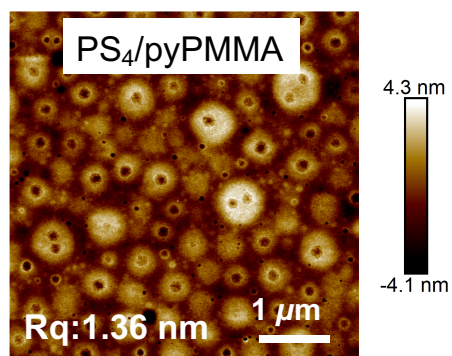

**Figure S1.** AFM height image of a polymer blend film of PS<sub>4</sub> and pyPMMA.

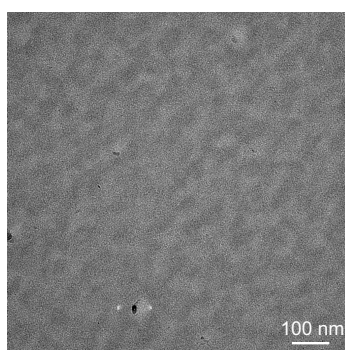

**Figure S2.** Bright-field TEM image of ZnPcPS<sub>4</sub>/pyPMMA film.

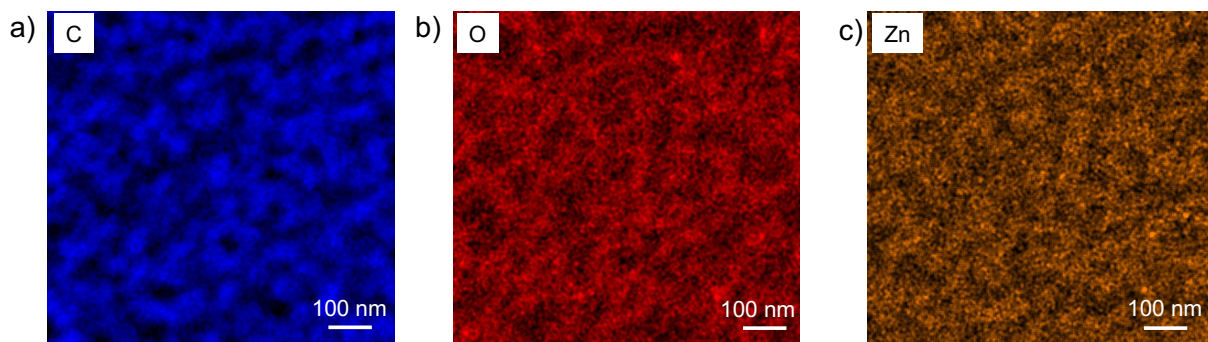

**Figure S3.** STEM-EDS elemental mapping image for carbon (a), oxygen (b), and Zn (c) of a polymer film of ZnPcPS<sub>4</sub>/pyPMMA.

**Table S2.** Device performances of C8-BTBT-based OFET memory using polymer dielectrics

| Memory layer                | Initial $V_{th}$ (V) | $I_{on}/I_{off}$ (A) | Mobility ( $\text{cm}^2 \text{V}^{-1} \text{s}^{-1}$ ) | Hole-trapping $V_{th(-)}^a$ (V) | Electron-trapping $V_{th(+)}^b$ (V) | Memory window (V) | Memory ratio |
|-----------------------------|----------------------|----------------------|--------------------------------------------------------|---------------------------------|-------------------------------------|-------------------|--------------|
| ZnPcPS <sub>4</sub> /pyPMMA | 0.57                 | $\sim 10^8$          | 0.31                                                   | -24.80                          | 22.43                               | 47.23             | $\sim 10^7$  |
| ZnPcPS <sub>4</sub>         | -2.05                | $\sim 10^7$          | 0.26                                                   | -33.54                          | 15.07                               | 48.61             | $\sim 10^6$  |
| pyPMMA                      | -12.15               | $\sim 10^7$          | 2.96                                                   | -17.42                          | -1.71                               | 15.71             | $\sim 10^7$  |

a) The threshold voltages  $V_{th(-)}$  estimated after applying  $V_g = -60$  V for 1 s. b) The threshold voltages  $V_{th(+)}$  estimated after applying  $V_g = +60$  V under UV light for 5 s.

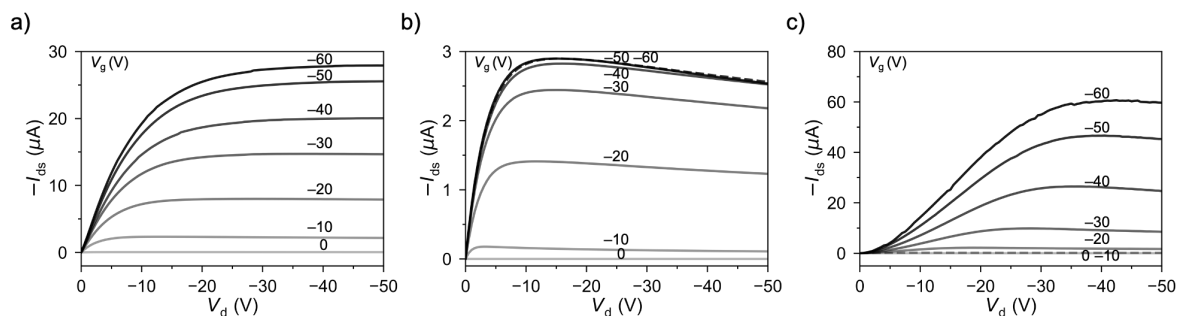**Figure S4.** Output characteristics for OFET devices with ZnPcPS<sub>4</sub>/pyPMMA (a), ZnPcPS<sub>4</sub> (b), and pyPMMA (c) layers.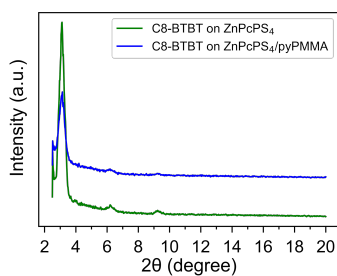**Figure S5.** XRD profiles of the C8-BTBT films on ZnPcPS<sub>4</sub> (green line) and ZnPcPS<sub>4</sub>/pyPMMA (blue line).

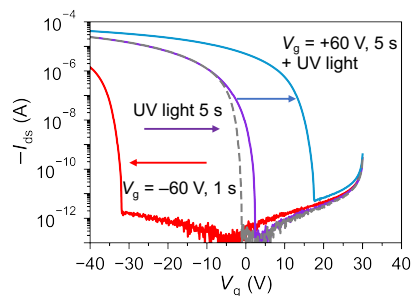

**Figure S6.** Transfer characteristics of OFET memory device with a polymer layer of ZnPcPS<sub>4</sub> at  $V_d = -50$  V. Transfer curves were monitored at the initial state (gray), after electric writing (red), after photo-erasing (purple), and after photo-assisted writing (blue) operations.

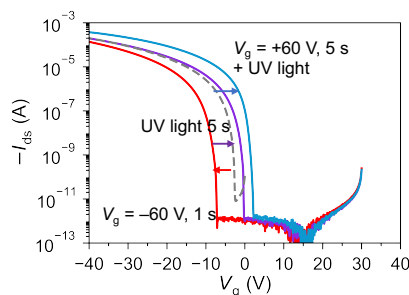

**Figure S7.** Transfer characteristics of OFET memory device with a polymer layer of pyPMMA at  $V_d = -50$  V. Transfer curves were monitored at the initial state (gray), after electric writing (red), after photo-erasing (purple), and after photo-assisted writing (blue) operations.

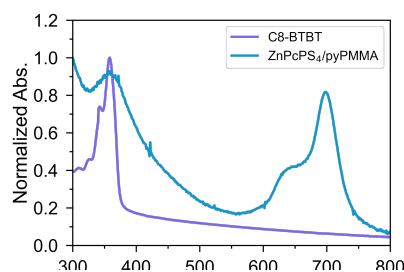

**Figure S8.** Absorption spectra of C8-BTBT film (purple line) and ZnPcPS<sub>4</sub>/pyPMMA blend film (blue line).

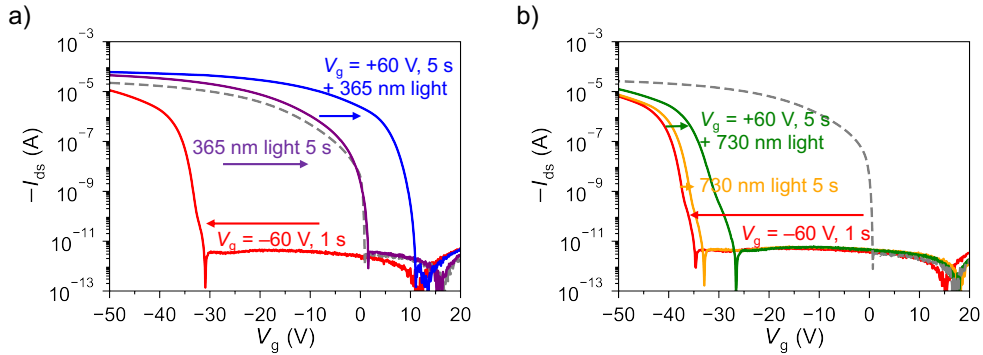

**Figure S9.** Transfer characteristics of OFET memory device with a polymer layer of ZnPcPS<sub>4</sub> at  $V_d = -50$  V by LED light irradiation at (a) 365 nm and (b) 730 nm.

The transfer curve at the initial state (gray dashed line) was shifted after applying  $V_g = -60$  V for 1 s (red line). Subsequent irradiation of 365 nm LED light for 5 s shifted the transfer curve to the initial state (purple line Figure S9a). Simultaneous exposure to  $V_g = +60$  V and 365 nm light for 5 s shifted the transfer curve to the positive direction (blue line Figure S9a). While irradiation of 730 nm LED light for 5 s (orange line Figure S9b) and simultaneous exposure to  $V_g = +60$  V and 730 nm light for 5 s (green line Figure S9b) resulted in only slight positive shift.

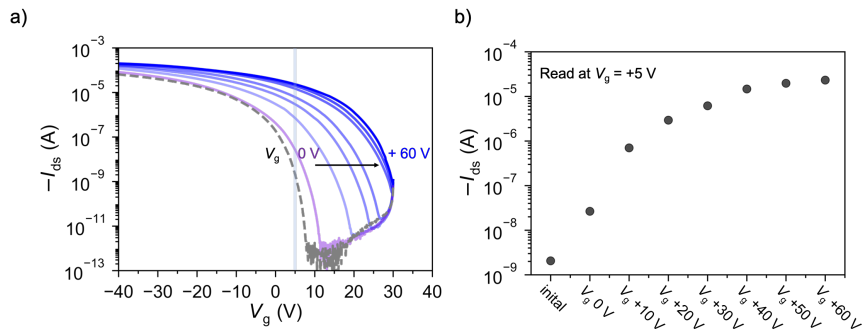

**Figure S10.** (a) Transfer characteristics of the OFET memory device with ZnPcPS<sub>4</sub>/pyPMMA memory layer at  $V_d = -50$  V after applying various positive  $V_g$  under the UV light irradiation for 5 s. (b) Drain current read at  $V_g = +5$  V and  $V_d = -50$  V after applying various positive  $V_g$  with UV light for 5 s.

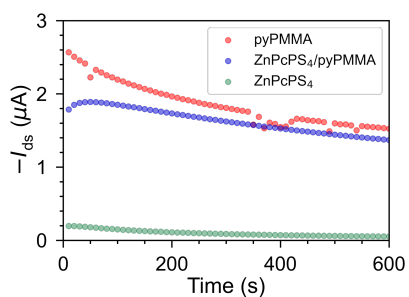

**Figure S11.** Retention time of  $I_{ds}$  monitored at  $V_g = 0$  V and  $V_d = -10$  V after photo-assisted programming of OFET memory devices with pyPMMA (red circle), ZnPcPS<sub>4</sub>/pyPMMA (blue circle) and ZnPcPS<sub>4</sub> (green circle) layers.

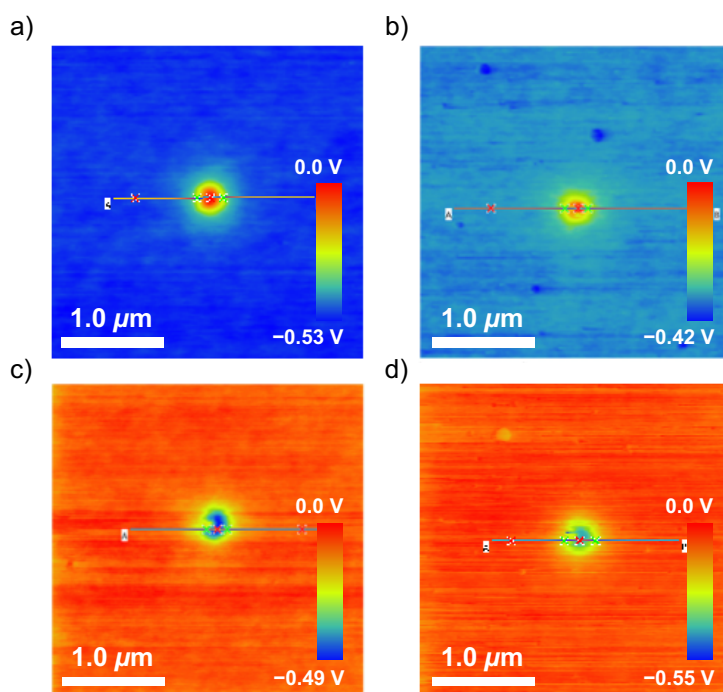

**Figure S12.** Surface potential images after applying  $V_{tip} = +10$  V onto ZnPcPS<sub>4</sub> (a) and pyPMMA (b). Surface potential images after applying  $V_{tip} = -10$  V of ZnPcPS<sub>4</sub> (c) and pyPMMA (d).

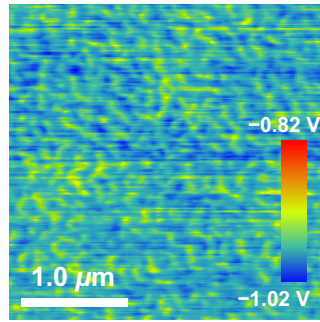

**Figure S13.** Surface potential image of ZnPcPS<sub>4</sub>/pyPMMA film at the initial state.
